# Supplementary material for: Source contributions and potential reductions tohealth effects of particulate matter in India
Source: Copernicus journal article supplement (doi:10.5194/acp-2018-483), 2018-06-08
Supplement: Supplementary file 1 [file acp-2018-483-supplement.pdf]

## **Supplemental Materials**

**for**

### **Source contributions and potential reductions to health effects of particulate matter in India**

Hao Guo<sup>1</sup>, Sri Harsha Kota<sup>2,3,4</sup>, Kaiyu Chen<sup>1</sup>, Shovan Kumar Sahu<sup>4</sup>, Jianlin Hu<sup>2</sup>, Qi Ying<sup>5</sup>,  
Hongliang Zhang<sup>1,\*</sup>

<sup>1</sup>Department of Civil and Environmental Engineering, Louisiana State University, Baton Rouge LA 70803, USA

<sup>2</sup>Jiangsu Key Laboratory of Atmospheric Environment Monitoring and Pollution Control, Jiangsu Engineering Technology Research Center of Environmental Cleaning Materials, Nanjing University of Information Science & Technology, Nanjing 210044, China

<sup>3</sup>Department of Civil Engineering, Indian Institute of Technology Delhi, 110016, India

<sup>4</sup>Department of Civil Engineering, Indian Institute of Technology Guwahati, 781039, India

<sup>5</sup>Zachry Department of Civil Engineering, Texas A&M University, College Station, TX 77843, USA

\*Corresponding author: Hongliang Zhang. Email: hlzhang@lsu.edu. Phone: +1-225-578-0140

Table S1. Baseline mortality ( $y_0, \times 10^5$ ) for chronic obstructive pulmonary disease (COPD), lung cancer (LC), ischemic heart disease (IHD) and cerebrovascular disease (CEV) for different age groups in India based on the WHO Mortality Database (for year 2000).

| Age   | COPD   |        | LC     |        | IHD    |        | CEV    |        |
|-------|--------|--------|--------|--------|--------|--------|--------|--------|
|       | Male   | Female | Male   | Female | Male   | Female | Male   | Female |
| 15-24 | 2.41   | 1.58   | 0.68   | 0.49   | 2.58   | 0.84   | 3.11   | 1.29   |
| 25-34 | 5.30   | 3.71   | 2.57   | 1.45   | 7.88   | 2.55   | 6.51   | 2.92   |
| 35-44 | 10.11  | 3.99   | 8.03   | 3.68   | 17.02  | 5.95   | 12.32  | 5.62   |
| 45-54 | 20.08  | 9.49   | 16.39  | 4.45   | 25.44  | 11.66  | 18.96  | 9.49   |
| 55-64 | 118.30 | 62.59  | 78.96  | 21.49  | 131.31 | 78.77  | 87.80  | 54.38  |
| 65-69 | 397.55 | 259.99 | 124.53 | 44.74  | 373.88 | 326.72 | 231.75 | 170.67 |
| 70+   | 397.55 | 259.99 | 124.53 | 44.74  | 373.88 | 326.72 | 231.75 | 170.67 |

Table S2. Population age distribution for India, 2015.

| Age group | Male   | Female |
|-----------|--------|--------|
| 15-24     | 20.60% | 20.60% |
| 25-34     | 17.50% | 17.70% |
| 35-44     | 13.00% | 13.10% |
| 45-54     | 9.60%  | 9.50%  |
| 55-64     | 6.41%  | 6.90%  |
| 65-69     | 2.10%  | 2.20%  |
| 70+       | 3.00%  | 3.50%  |

Data source: United Nations, Department of Economic and Social Affairs, Population Division

58 (2015). World Population Prospects: The 2015 Revision, custom data acquired via website.

Table S3. Comparison of the cause of excess mortality by disease and sources from this study with those from other studies in India.

|                                   | This study       | Lelieveld et al. (2015) | Ghude et al.(2016) |
|-----------------------------------|------------------|-------------------------|--------------------|
| Excess mortality (million deaths) | 1.04 (0.53,1.54) | 0.65                    | 0.57               |
| COPD (%)                          | 17.7             | 17.3                    |                    |
| LC (%)                            | 1.3              | 2.1                     |                    |
| IHD (%)                           | 38.8             | 45.7                    |                    |
| CEV (%)                           | 42.4             | 34.9                    |                    |
| Source Contributions (%)          |                  |                         |                    |
| Energy                            | 6.8              | 14                      |                    |
| Industry                          | 19.7             | 7                       |                    |
| Residential                       | 55.5             | 50                      |                    |
| Agriculture                       | 11.9             | 6                       |                    |
| Traffic                           | 1.9              | 5                       |                    |
| Dust                              | 4                | 11                      |                    |

Table S4. Source contributions of each source types to premature mortality due to COPD, LC, IHD and Stroke due to long term exposure of ambient PM<sub>2.5</sub> based on predicted 2015 annual average concentrations.

| State                | Energy | Industry | Residential | On-road | Off-road | Agriculture | Open-burning | Dust   |
|----------------------|--------|----------|-------------|---------|----------|-------------|--------------|--------|
| Andhra Pradesh       | 13.50% | 18.75%   | 48.50%      | 1.25%   | 1.25%    | 9.75%       | 0.25%        | 6.75%  |
| Arunachal Pradesh    | 0%     | 0%       | 50%         | 0%      | 0%       | 50%         | 0%           | 0%     |
| Assam                | 1.88%  | 6.88%    | 61.25%      | 0.63%   | 1.25%    | 24.37%      | 2.50%        | 1.25%  |
| Bihar                | 2.32%  | 18.70%   | 62.01%      | 0.66%   | 0.66%    | 13.96%      | 0.08%        | 1.24%  |
| Chandigarh           | 0%     | 0%       | 100%        | 0%      | 0%       | 0%          | 0%           | 0%     |
| Chhattisgarh         | 22.625 | 13.13%   | 40.87%      | 0.73%   | 0.73%    | 0.73%       | 16.78%       | 5.10%  |
| Dadra & Nagar Haveli | 0%     | 0%       | 100%        | 0%      | 0%       | 0%          | 0%           | 0%     |
| Daman & Diu          | 0%     | 0%       | 100%        | 0%      | 0%       | 0%          | 0%           | 0%     |
| Goa                  | 14.28% | 14.28%   | 57.14%      | 0%      | 0%       | 14.28%      | 0%           | 0%     |
| Gujrat               | 10.23% | 17.40%   | 53.24%      | 1.70%   | 1.02%    | 5.11%       | 0%           | 11.26% |
| Haryana              | 6.42%  | 25.71%   | 52.14%      | 1.42%   | 0.71%    | 9.28%       | 0.24%        | 4.28%  |
| Himachal Pradesh     | 9.67%  | 12.90%   | 54.83%      | 3.22%   | 0%       | 12.90%      | 0%           | 6.45%  |
| Jammu & Kashmir      | 0%     | 9.09%    | 68.18%      | 0%      | 0%       | 13.63%      | 0%           | 9.09%  |
| Jharkhand            | 10.06% | 26.29%   | 48.05%      | 0.65%   | 0.97%    | 12.01%      | 0.32%        | 2.27%  |
| Karnataka            | 9.40%  | 14.35%   | 54.95%      | 3.46%   | 1.48%    | 8.91%       | 0.49%        | 6.93%  |
| Kerala               | 3.41%  | 26.13%   | 62.50%      | 1.70%   | 1.13%    | 3.40%       | 0%           | 0.56%  |
| Lakshadweep          | 0%     | 0%       | 0%          | 0%      | 0%       | 0%          | 0%           | 0%     |
| Madhya Pradesh       | 10.85% | 10.59%   | 55.29%      | 1.03%   | 1.03%    | 12.14%      | 0.26%        | 9.04%  |
| Maharashtra          | 11.44% | 23.87%   | 49.01%      | 1.13%   | 0.98%    | 7.76%       | 0.14%        | 5.64%  |
| Manipur              | 0%     | 12.50%   | 50%         | 0%      | 0%       | 12.50%      | 12.50%       | 0%     |
| Meghalaya            | 5.55%  | 11.11%   | 55.55%      | 0%      | 0%       | 22.22%      | 0%           | 0%     |
| Mizoram              | 0%     | 0%       | 50%         | 0%      | 0%       | 25%         | 0%           | 0%     |
| Nagaland             | 0%     | 12.50%   | 62.50%      | 0%      | 0%       | 12.50%      | 12.50%       | 0%     |
| Delhi                | 5.83%  | 40%      | 45.83%      | 0.83%   | 0.83%    | 4.16%       | 0%           | 2.50%  |
| Odisha               | 17.39% | 14.62%   | 45.45%      | 0.79%   | 0.79%    | 17%         | 0.39%        | 3.95%  |
| Puducherry           | 12.50% | 25%      | 50%         | 0%      | 0%       | 12.50%      | 0%           | 0%     |
| Punjab               | 3.75%  | 14.28%   | 57.51%      | 1.50%   | 0.75%    | 17.67%      | 0.38%        | 4.51%  |
| Rajasthan            | 4.88%  | 9.19%    | 57.47%      | 2.01%   | 1.14%    | 7.75%       | 0.28%        | 17.24% |
| Sikkim               | 7.40%  | 38.88%   | 46.29%      | 1.85%   | 0%       | 3.70%       | 0%           | 1.85%  |
| Tamil Nadu           | 15.11% | 19.55%   | 52.88%      | 1.77%   | 0.88%    | 7.55%       | 0%           | 1.77%  |
| Tripura              | 5.26%  | 5.26%    | 63.15%      | 0%      | 0%       | 21.05%      | 0%           | 0%     |
| Uttar Pradesh        | 4.03%  | 18.75%   | 61%         | 0.83%   | 0.83%    | 12%         | 0.08%        | 2.45%  |
| Uttarakhand          | 2.63%  | 10.52%   | 65.78%      | 2.63%   | 2.63%    | 13.15%      | 0%           | 5.26%  |
| West Bengal          | 5.21%  | 26.68%   | 49.54%      | 0.60%   | 0.70%    | 15.84%      | 0.10%        | 1.30%  |
| India                | 6.80%  | 19.66%   | 55.45%      | 1.05%   | 0.85%    | 11.90%      | 0.23%        | 4.02%  |

Table S5. Premature mortality reduction in percentage attributable to PM<sub>2.5</sub> exposure in 2015 and premature mortality when PM<sub>2.5</sub> reduced to 40µg/m<sup>3</sup>, 15 µg/m<sup>3</sup>, 12µg/m<sup>3</sup> and 10/µg m<sup>3</sup> (WHO guideline level) at highly polluted states (Annual average concentration ≥ 40µg/m<sup>3</sup>).

| States         | 40µg/m <sup>3</sup> | 15µg/m <sup>3</sup> | 12µg/m <sup>3</sup> | 10µg/m <sup>3</sup> |
|----------------|---------------------|---------------------|---------------------|---------------------|
| Assam          | 3.51%               | 37.54%              | 53.68%              | 67.02%              |
| Bihar          | 18.77%              | 61.58%              | 71.73%              | 79.88%              |
| Chhattisgarh   | 3.97%               | 40.79%              | 56.68%              | 68.95%              |
| Haryana        | 14.71%              | 59.00%              | 69.72%              | 78.55%              |
| Jharkhand      | 7.17%               | 55.23%              | 67.05%              | 76.55%              |
| Madhya Pradesh | 1.46%               | 34.31%              | 51.60%              | 65.56%              |
| Maharashtra    | 5.29%               | 42.22%              | 57.47%              | 69.75%              |
| Delhi          | 25.68%              | 64.86%              | 74.32%              | 81.76%              |
| Odisha         | 2.90%               | 46.91%              | 60.81%              | 72.20%              |
| Punjab         | 5.18%               | 52.59%              | 65.03%              | 75.13%              |
| Rajasthan      | 2.07%               | 29.19%              | 46.73%              | 62.20%              |
| Uttar Pradesh  | 15.12%              | 59.34%              | 70.03%              | 78.68%              |
| West Bengal    | 19.70%              | 61.36%              | 71.49%              | 79.68%              |

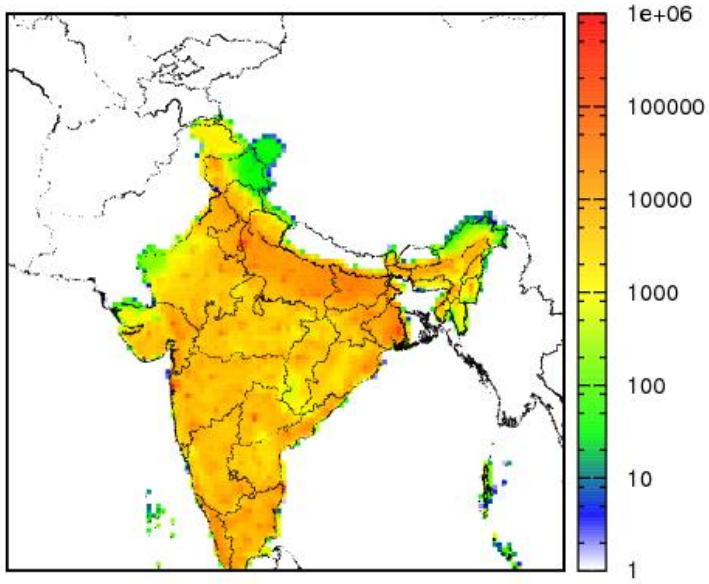

Figure S1. Design of  $36 \times 36 \text{ km}^2$  India domain with colorbar represent population density in each grid.

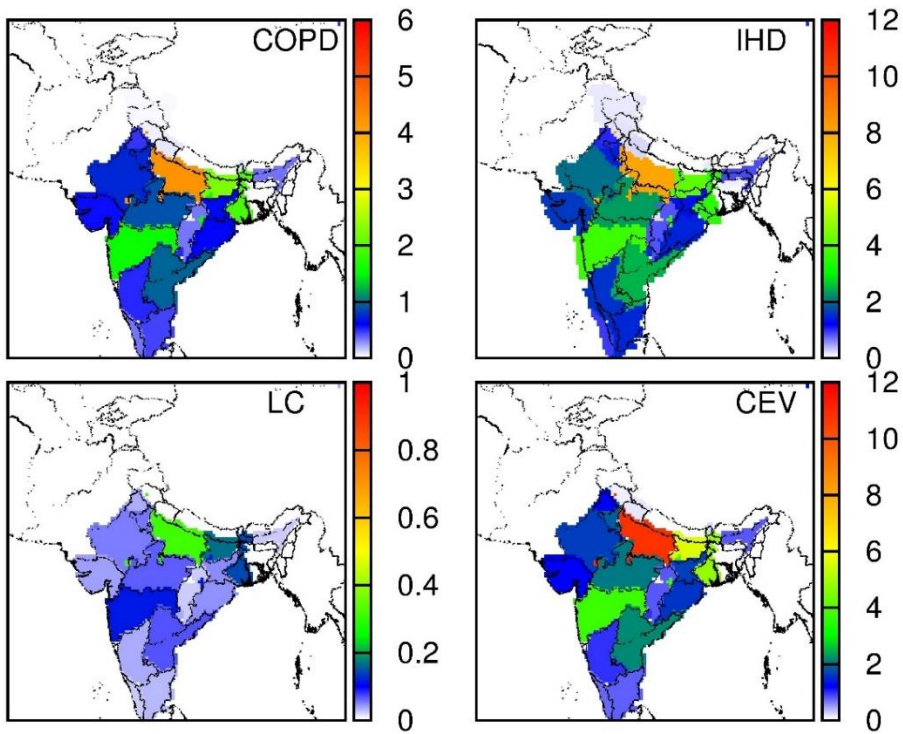

Figure S2. State-level disease specific mortality ( $\times 10^4$  deaths) in 2015 due to COPD, LC, IHD and CEV.
